# Supplementary material for: Rational design of a low-cost, simple technology and high-performance CoNi/Co3O4 as a catalyst in sodium borohydride electro-oxidation reaction
Source: Royal Society of Chemistry journal article supplement (doi:10.1039/d4nj01162g), 2024-01-01
Supplement: d4nj01162g1.pdf [file d4nj01162g1.pdf]

## Supporting Information

### **Rational design of a low-cost, simple technology and high-performance CoNi/Co<sub>3</sub>O<sub>4</sub> as a catalyst in sodium borohydride electro-oxidation reaction**

Kaixuan Liu<sup>+</sup>, Borong Lu<sup>+</sup>, Ronghang Cui, Jinling Yin, Kai Zhu, Guiling Wang,

Dianxue Cao, Ke Ye\*

Key Laboratory of Superlight Materials and Surface Technology of Ministry of Education, College of Materials Science and Chemical Engineering, Harbin Engineering University, Harbin 150001, China

<sup>+</sup> These authors contributed equally to this work.

\*Corresponding author.

E-mail: [yeke@hrbeu.edu.cn](mailto:yeke@hrbeu.edu.cn)

## 1.Characterization and electrochemical measurements

The composition of the catalysts was investigated using X-ray diffraction (XRD) (Cu-K $\alpha$ ). The composition of the catalyst surface was investigated using X-ray photoelectron spectroscopy (XPS), with the C1s peak (284.8 eV) as the calibration peak. Scanning electron microscopy (SEM) and transmission electron microscopy (TEM) were used to analyze and study the morphology of the electrodes. The distribution of Co and Ni elements on the catalyst surface was analyzed using energy spectrometry (EDS).

The electrochemical tests were all carried out in a typical three-electrode system, which consists of a working electrode, an Ag/AgCl reference electrode (the filling solution is a saturated KCl solution), and a graphite counter electrode. The electrochemical testing methods were cyclic voltammetry (CV), chronoamperometry (CA), and linear sweep voltammetry (LSV).

## 2. Calculation formula

The diffusion coefficient  $D$  of NaBH<sub>4</sub> was calculated using the expression proposed by Wang et al<sup>1</sup>, which is mainly related to the concentration of NaOH solution, 2 mol L<sup>-1</sup> NaOH was used in this experiment.

$$D_{\text{BH}_4^-} = 2.01 \times 10^{-5} - 3.65 \times 10^{-6}x + 2.25 \times 10^{-7}x^2 \quad (\text{Eq. S1})$$

where  $x$  is the concentration of NaOH, and  $D$  was calculated to be  $1.37 \times 10^{-5}$  in 2 mol L<sup>-1</sup> NaOH concentration.

The electrooxidation of NaBH<sub>4</sub> at the electrode can be evaluated in terms of the reaction order  $\beta$ , which is calculated as follows:

$$j_p = zC_{\text{NaBH}_4}^\beta \quad (\text{Eq. S2})$$

where  $j_p$  is the peak current density ( $\text{A cm}^{-2}$ ),  $z$  is the A constant, and  $C$  is the  $\text{NaBH}_4$  concentration ( $\text{mol cm}^{-3}$ ).

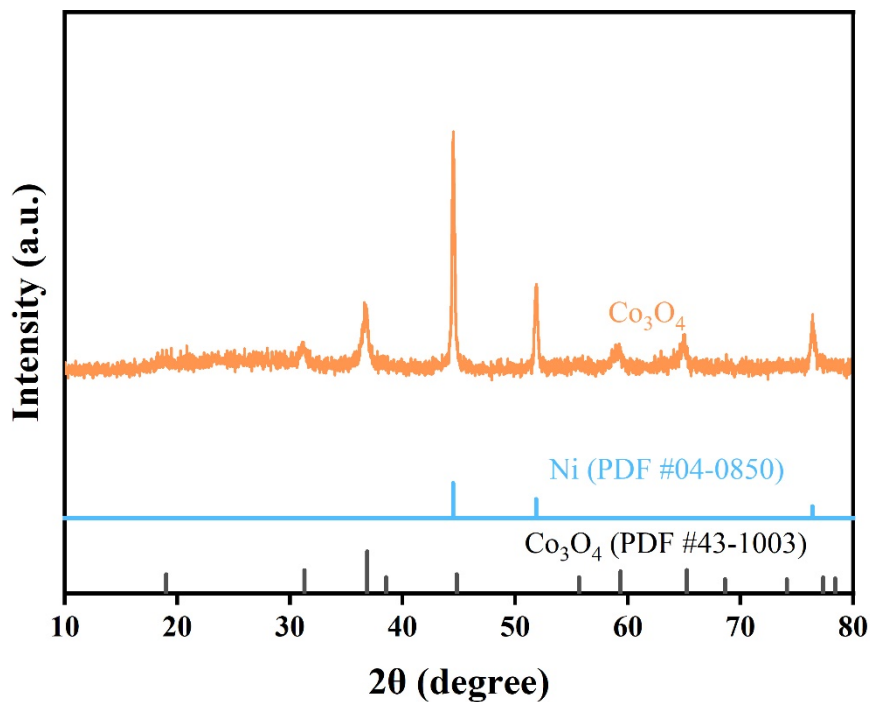

Fig. S1 XRD spectra of  $\text{Co}_3\text{O}_4$ .

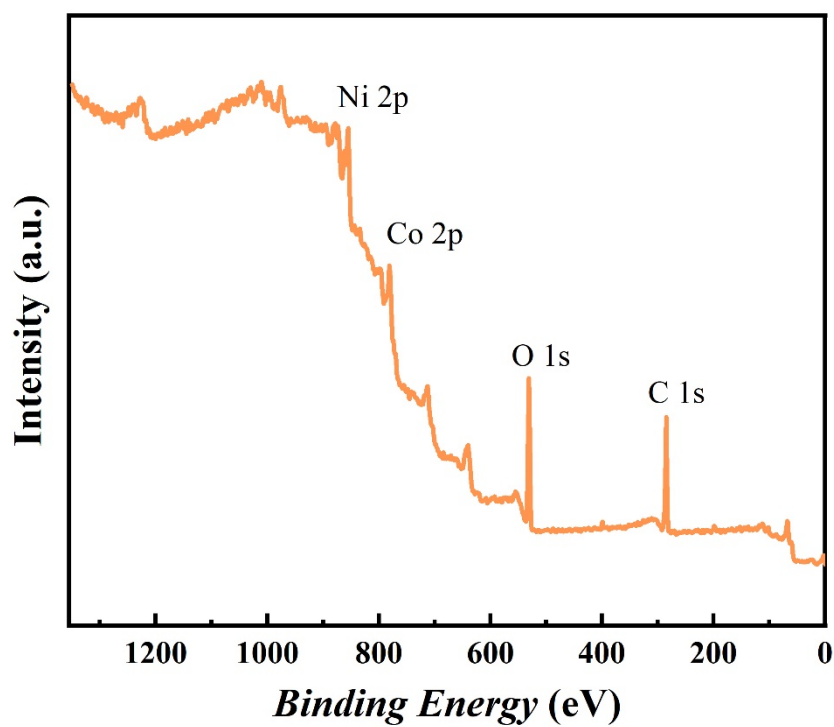

Fig. S2 XPS spectra of  $\text{CoNi/Co}_3\text{O}_4$  electrodes.

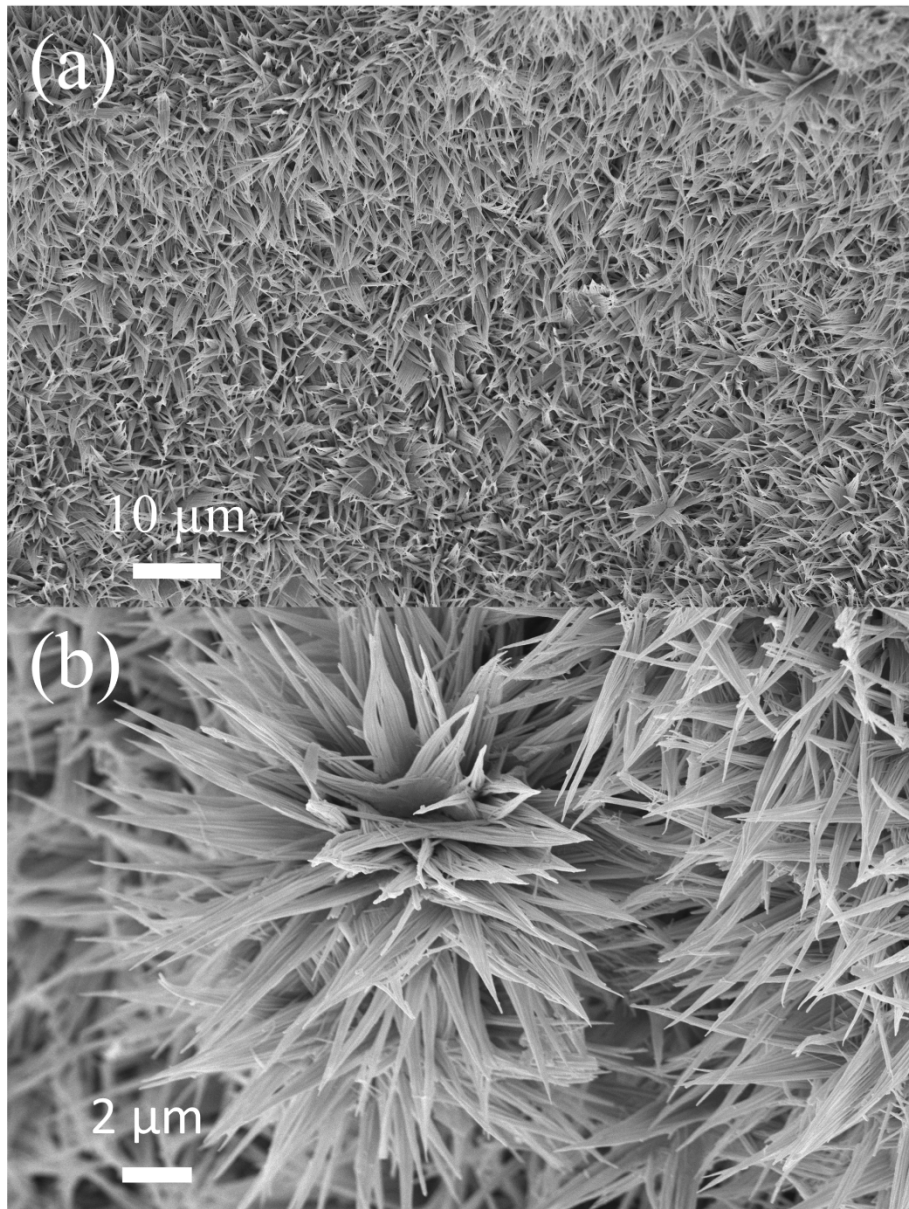

**Fig. S3** SEM image of  $\text{Co}_3\text{O}_4$ .

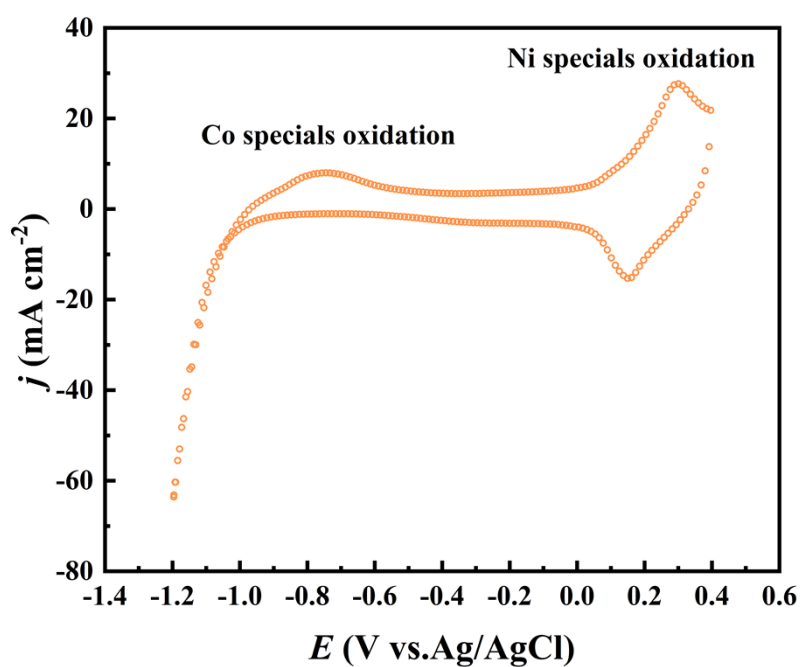

**Fig. S4** CV curves for CoNi/Co<sub>3</sub>O<sub>4</sub> catalysts (1:1 concentration ratio of Ni and Co in the deposition solution) at 2 mol L<sup>-1</sup> NaOH.

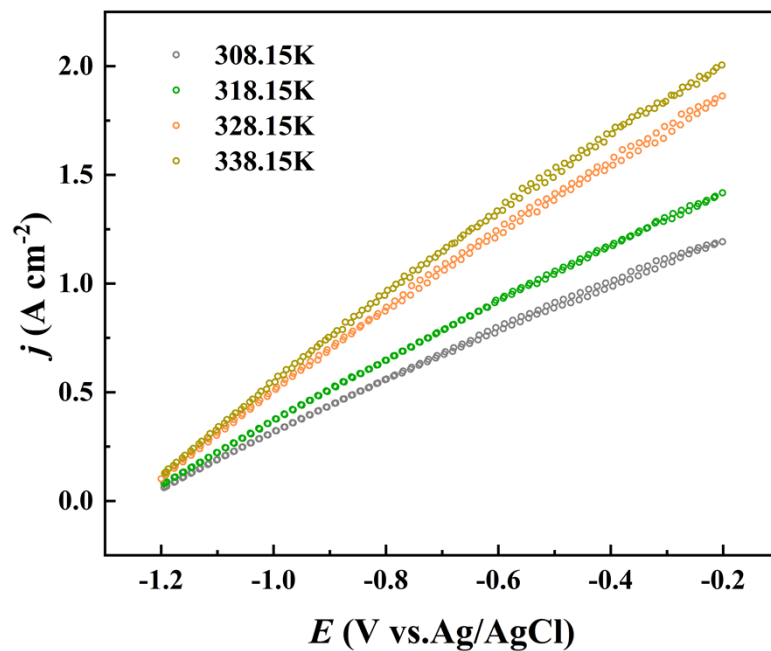

**Fig. S5** CV curves of CoNi/Co<sub>3</sub>O<sub>4</sub> catalysts were tested in 2 mol L<sup>-1</sup> NaOH and 0.2 mol L<sup>-1</sup> NaBH<sub>4</sub> at different temperatures (Ni:Co=1:1).

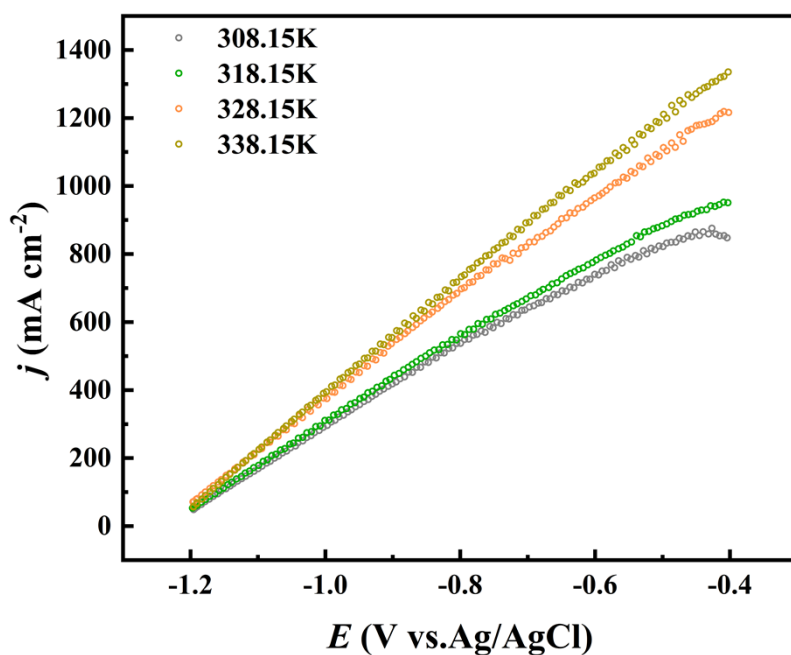

**Fig. S6** CV curves of CoN/Co<sub>3</sub>O<sub>4</sub> catalysts were tested in 2 mol L<sup>-1</sup> NaOH and 0.2 mol L<sup>-1</sup> NaBH<sub>4</sub> at different temperatures (Ni:Co =1:2).

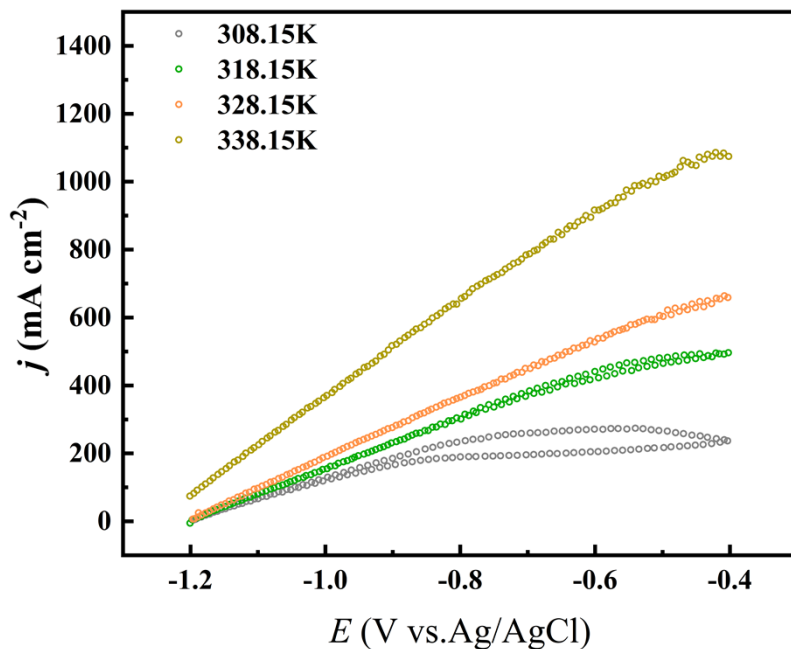

**Fig. S7** CV curves of CoNi/Co<sub>3</sub>O<sub>4</sub> catalysts were tested in 2 mol L<sup>-1</sup> NaOH and 0.2 mol L<sup>-1</sup> NaBH<sub>4</sub> at different temperatures (Ni:Co =3:1).

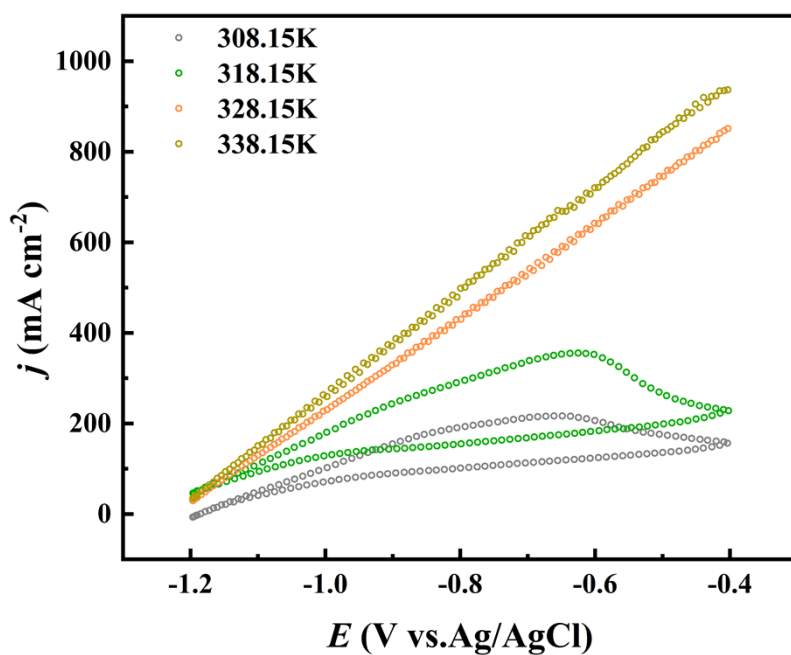

**Fig. S8** CV curves of CoNi/Co<sub>3</sub>O<sub>4</sub> catalysts were tested in 2 mol L<sup>-1</sup> NaOH and 0.2 mol L<sup>-1</sup> NaBH<sub>4</sub> at different temperatures (Ni:Co =2:1).

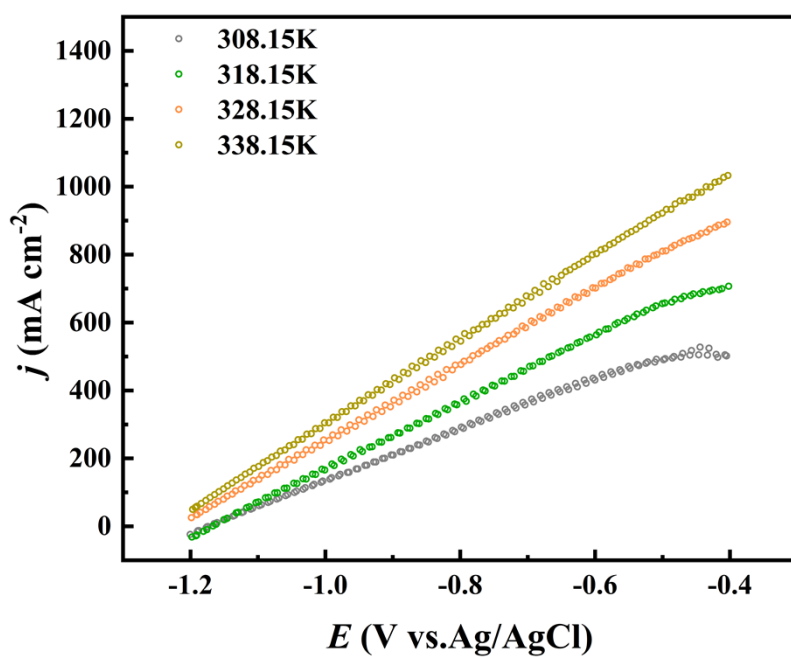

**Fig. S9** CV curves of CoNi/Co<sub>3</sub>O<sub>4</sub> catalysts were tested in 2 mol L<sup>-1</sup> NaOH and 0.2 mol L<sup>-1</sup> NaBH<sub>4</sub> at different temperatures (Ni:Co =1:3).

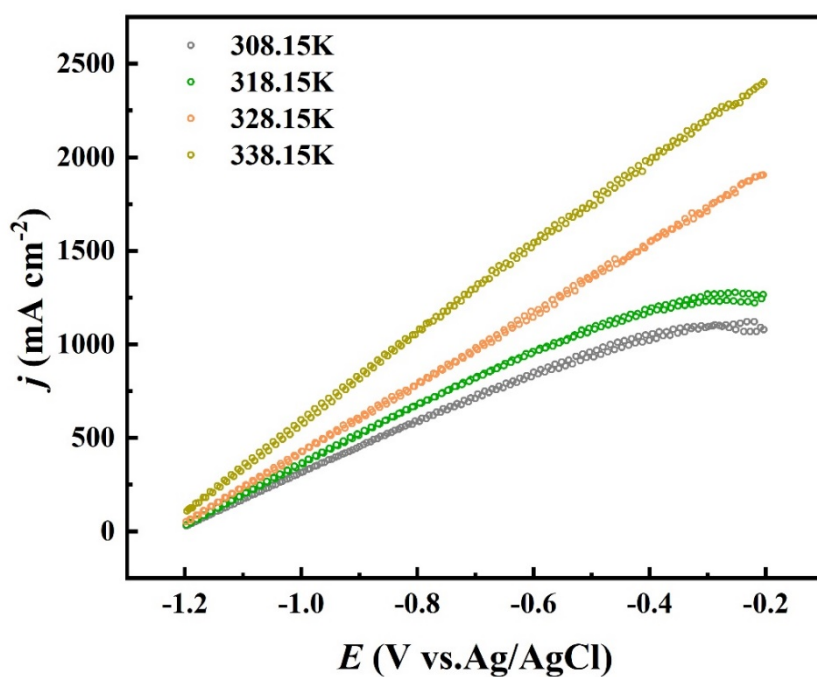

**Fig. S10** CV curves of Co<sub>3</sub>O<sub>4</sub> catalysts were tested in 2 mol L<sup>-1</sup> NaOH and 0.2 mol L<sup>-1</sup> NaBH<sub>4</sub> at different temperatures.

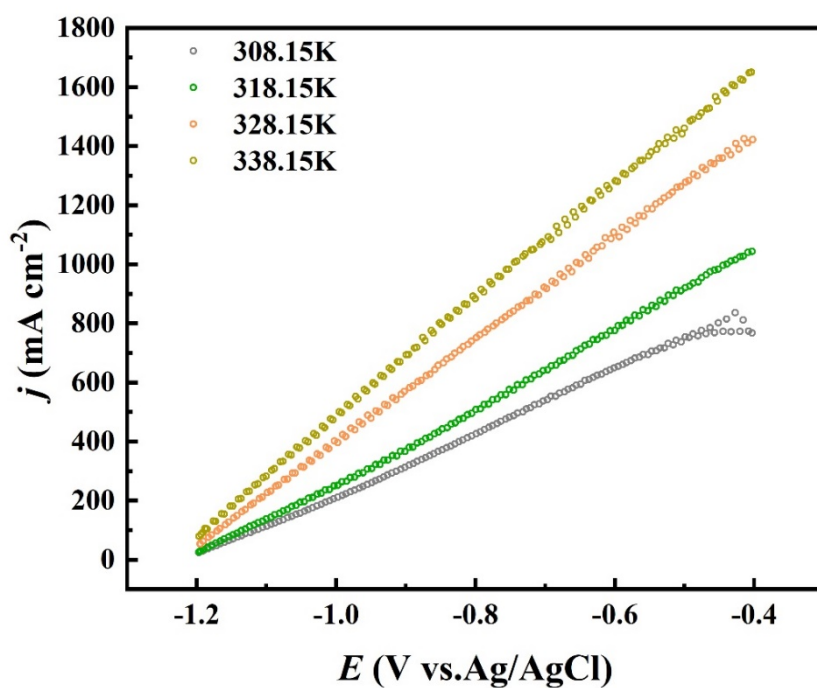

**Fig. S11** CV curves of CoNi catalysts were tested in 2 mol L<sup>-1</sup> NaOH and 0.2 mol L<sup>-1</sup> NaBH<sub>4</sub> at different temperatures.



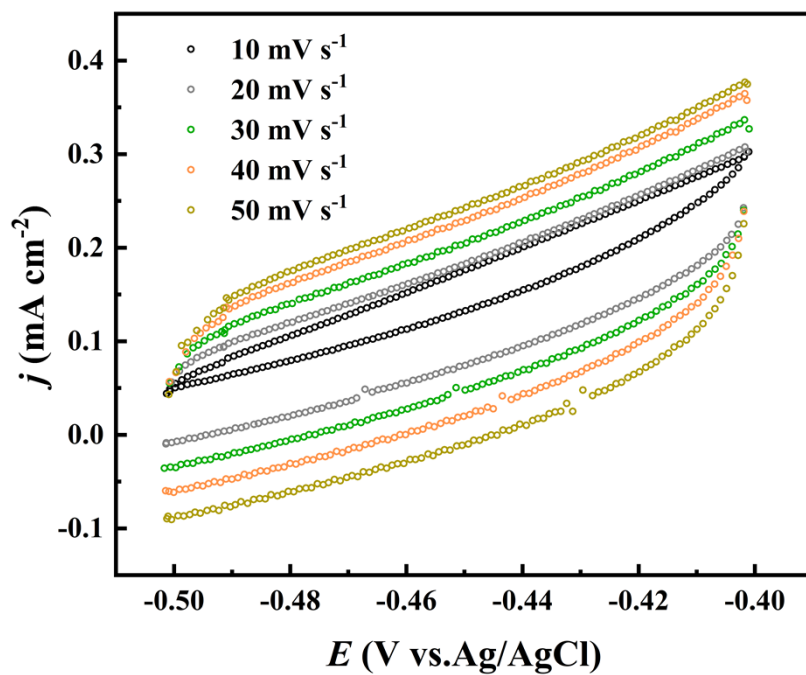

**Fig. S12** CV curves of NF electrode at different scan rates (10-50  $\text{mV s}^{-1}$ ) in 2 mol  $\text{L}^{-1}$  NaOH.

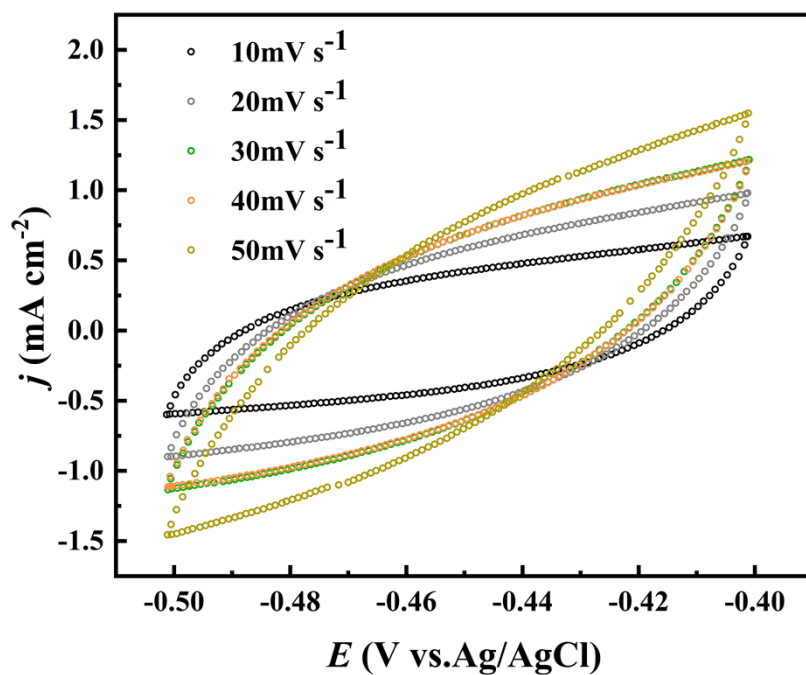

**Fig. S13** CV curves of  $\text{Co}_3\text{O}_4$  electrode at different scan rates (10-50  $\text{mV s}^{-1}$ ) in 2 mol  $\text{L}^{-1}$  NaOH.

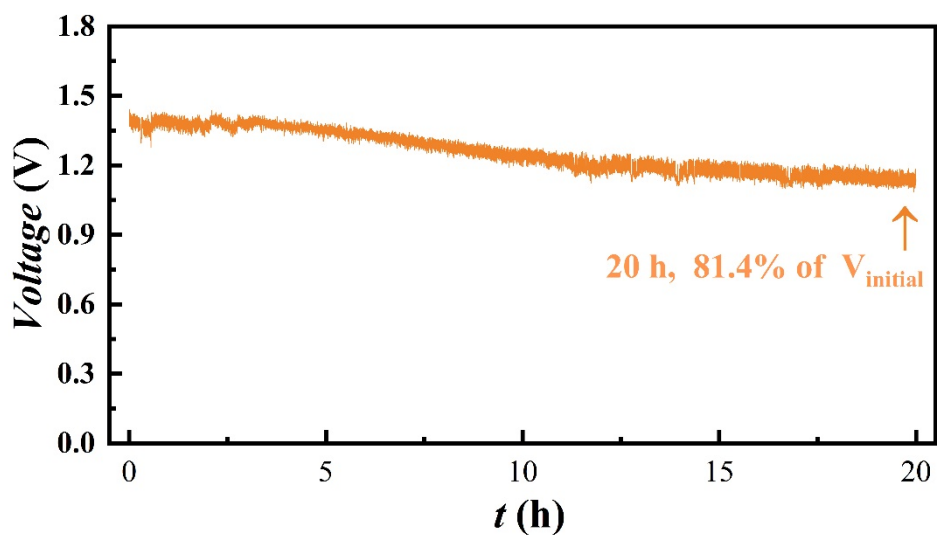

**Fig. S14** Constant discharge current test at  $60 \text{ mA cm}^{-2}$ .

**Table. S1** Comparison of different electrodes regarding current density in a three-electrode system.

| Electrode                           | Composition of electrolyte         | $j$ ( $\text{mA cm}^{-2}$ ) | Ref.      |
|-------------------------------------|------------------------------------|-----------------------------|-----------|
| CoNi/Co <sub>3</sub> O <sub>4</sub> | 2 M NaOH+0.1 M NaBH <sub>4</sub>   | 650                         | This work |
| NiMoN@NC-600                        | 1 M NaOH+0.135 M NaBH <sub>4</sub> | ~ 100                       | 2         |
| AuCo@rGO                            | 2 M NaOH+0.12 M NaBH <sub>4</sub>  | ~ 450                       | 3         |
| CoNi@rGO                            | 2 M NaOH+0.1 M NaBH <sub>4</sub>   | ~ 190                       | 4         |
| Ni@Zn                               | 2 M NaOH+0.135 M NaBH <sub>4</sub> | ~ 270                       | 5         |
| CuNiPd                              | 2 M NaOH+0.1 M NaBH <sub>4</sub>   | ~ 630                       | 6         |
| Ni@NiP                              | 2 M NaOH+0.135 M NaBH <sub>4</sub> | ~ 255                       | 7         |

**Table. S2** A comparison of DBHPFC performance.

| Anode                               | Cathode      | Anolyte                              | Catholyte                                                                     | T(K)   | Power<br>(mW<br>cm <sup>-2</sup> ) | Ref.         |
|-------------------------------------|--------------|--------------------------------------|-------------------------------------------------------------------------------|--------|------------------------------------|--------------|
| CoNi/Co <sub>3</sub> O <sub>4</sub> | Pt/C         | 2 M NaOH+<br>0.3 M NaBH <sub>4</sub> | 1M H <sub>2</sub> SO <sub>4</sub> +<br>1.2 M H <sub>2</sub> O <sub>2</sub>    | 313.15 | 108.5                              | This<br>work |
| CoNi-NS/Ni                          | Pd/Ti        | 4 M NaOH+<br>0.5 M NaBH <sub>4</sub> | 2M H <sub>2</sub> SO <sub>4</sub> +<br>0.8 M H <sub>2</sub> O <sub>2</sub>    | 303.15 | 80.6                               | 4            |
| CoNi-NS/rGO                         | Pd/Ti        | 4 M NaOH+<br>0.5 M NaBH <sub>4</sub> | 2M H <sub>2</sub> SO <sub>4</sub> +<br>0.8 M H <sub>2</sub> O <sub>2</sub>    | 333.15 | 140                                | 4            |
| Ni@Zn                               | Pt/C         | 3 M NaOH+<br>2 M NaBH <sub>4</sub>   | 1 M H <sub>2</sub> SO <sub>4</sub> +<br>4 M H <sub>2</sub> O <sub>2</sub>     | 298.15 | 180.3                              | 5            |
| Pd/C + Ni<br>(0.5)                  | Pt/C         | 3 M NaOH+<br>1.5 M NaBH <sub>4</sub> | 1.5 M H <sub>2</sub> SO <sub>4</sub><br>+15 wt% H <sub>2</sub> O <sub>2</sub> | 353.15 | 50                                 | 8            |
| Pd@N/C-8                            | Pd@N/C-<br>8 | 2 M NaOH+<br>0.3 M NaBH <sub>4</sub> | 2 M H <sub>2</sub> SO <sub>4</sub> +<br>1.6 M H <sub>2</sub> O <sub>2</sub>   | 333.15 | 137                                | 9            |

## References

1. D. M. F. Santos and C. A. C. Sequeira, *Electrochim. Acta*, 2010, **55**, 6775-6781.
2. B. He, S. Zhuang, X. Tai, J. Zhang, A. Xie, L. Cheng, P. Song, Y. Tang, Y. Chen and P. Wan, *ACS Appl. Mater. Interfaces*, 2022, **14**, 17631-17641.
3. B. Li, C. Song, D. Zhang, K. Ye, K. Cheng, K. Zhu, J. Yan, D. Cao and G. Wang, *Carbon*, 2019, **152**, 77-88.
4. B. Li, Q. Yan, C. Song, P. Yan, K. Ye, K. Cheng, K. Zhu, J. Yan, D. Cao and G. Wang, *Appl. Surf. Sci.*, 2019, **491**, 659-669.
5. B. Hu, P. Chen, C. Xu, J. Meng, J. Cai, Y. Yang, B. Zhang, D. Yu, X. Zhou and C. Chen, *Appl. Catal. B-Environ.*, 2022, **307**, 121183.
6. C. Y. Song, G. L. Wang, B. P. Li, C. X. Miao, K. J. Ma, K. Zhu, K. Cheng, K. Ye, J. Yan, D. X. Cao and J. L. Yin, *Electrochim. Acta*, 2019, **299**, 395-404.

7. B. Hu, Y. Xie, Y. Yang, J. Meng, J. Cai, C. Chen, D. Yu and X. Zhou, *Appl. Catal. B-Environ.*, 2023, **324**, 122257.
8. Y. Ko, L. Lombardo, M. Li, T. H. M. Pham, H. N. Yang and A. Züttel, *Adv. Energy Mater.*, 2022, **12**, 2103539.
9. X. Z. Yin, K. Zhu, K. Ye, J. Yan, D. X. Cao, D. M. Zhang, J. X. Yao and G. L. Wang, *J. Power Sources*, 2022, **541**, 231704.
